# Supplementary material for: Microstructure and Biological Properties of Electrospun In Situ Polymerization of Polycaprolactone-Graft-Polyacrylic Acid Nanofibers and Its Composite Nanofiber Dressings
Source: MDPI journal article supplement (doi:10.3390/polym13234246), 2021-12-03
Supplement: s1 [file s1]

## Supplementary Material

# Microstructure and Biological Properties of Electrospun In-situ Polymerization of Polycaprolactone-Graft-Polyacrylic Acid Nanofibers and Its Composite Nanofiber Dressings

Yi-Jen Huang <sup>1, ‡</sup>, Chien-Lin Huang <sup>1, ‡, \*</sup>, Ruo-Yu Lai <sup>1</sup>, Cheng-Han Zhuang <sup>1</sup>, Wei-Hao Chiu <sup>2</sup>, and Kun-Mu Lee <sup>2, 3, 4, \*</sup>

<sup>1</sup> Department of Fiber and Composite Materials, Feng Chia University, Taichung 40724, Taiwan; yijenhua@gmail.com (Y.-J.H.); clhuang@mail.fcu.edu.tw (C.-J.H.); judy91206@gmail.com (R.-Y.L.); skyforest1316@gmail.com (C.-H.Z.)

<sup>2</sup> Center for Green Technology, Chang Gung University, Taoyuan 33302, Taiwan; kmlee@mail.cgu.edu.tw (K.-M.L.); weihao.chiu@gmail.com (W.-H.C.)

<sup>3</sup> Department of Chemical and Materials Engineering, Chang Gung University, Taoyuan 33302, Taiwan

<sup>4</sup> Department of Pediatrics, Chang Gung Memorial Hospital, Linkou, Taoyuan 33305, Taiwan

‡ These authors contributed equally to this work

\* Correspondence: clhuang@mail.fcu.edu.tw (C.-J.H.); kmlee@mail.cgu.edu.tw (K.-M.L.); Tel.: +886-4-24517250 (ext. 3437) (C.-L.H.)

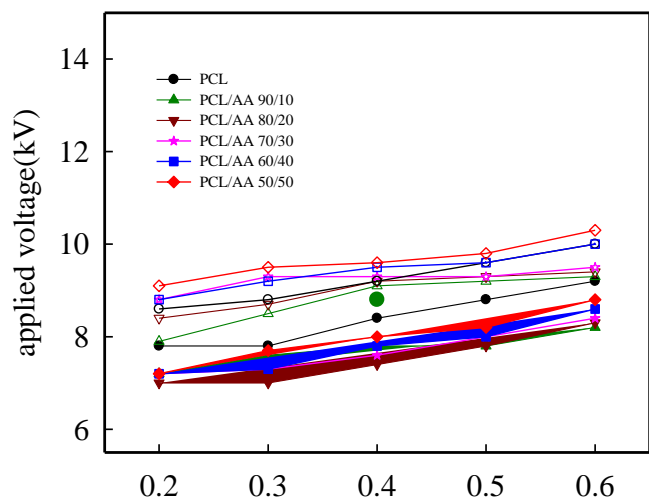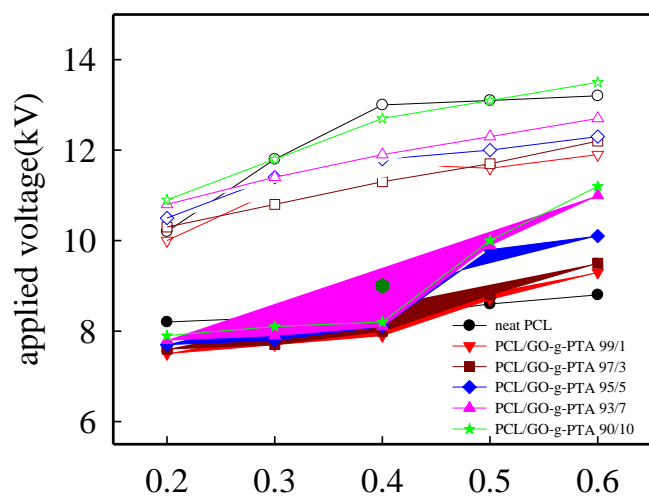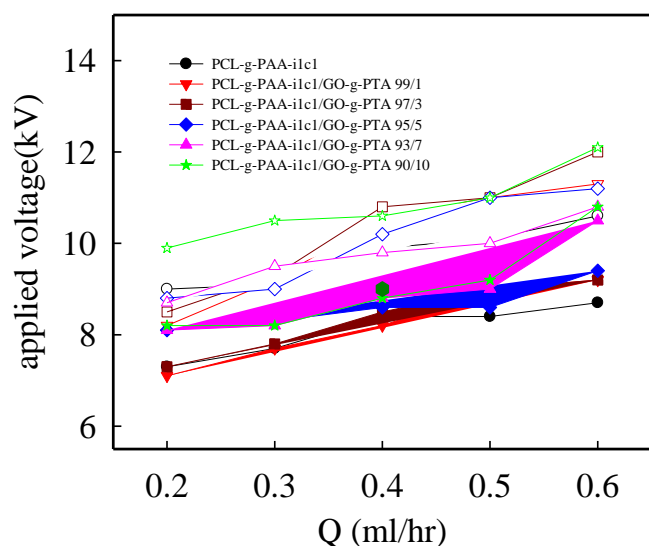

Figure S1. Functional domain for the electrospinning solution of 14 wt% PCL with (a) various AA contents, (b) various GO-*g*-PTA contents, and (c) 20 wt% AA and various GO-*g*-PTA contents. The domains indicated the range of operating electrical fields required for the stable cone-jet mode. (Filled symbols for lower bond applied voltage and open symbols for upper bond applied voltage).

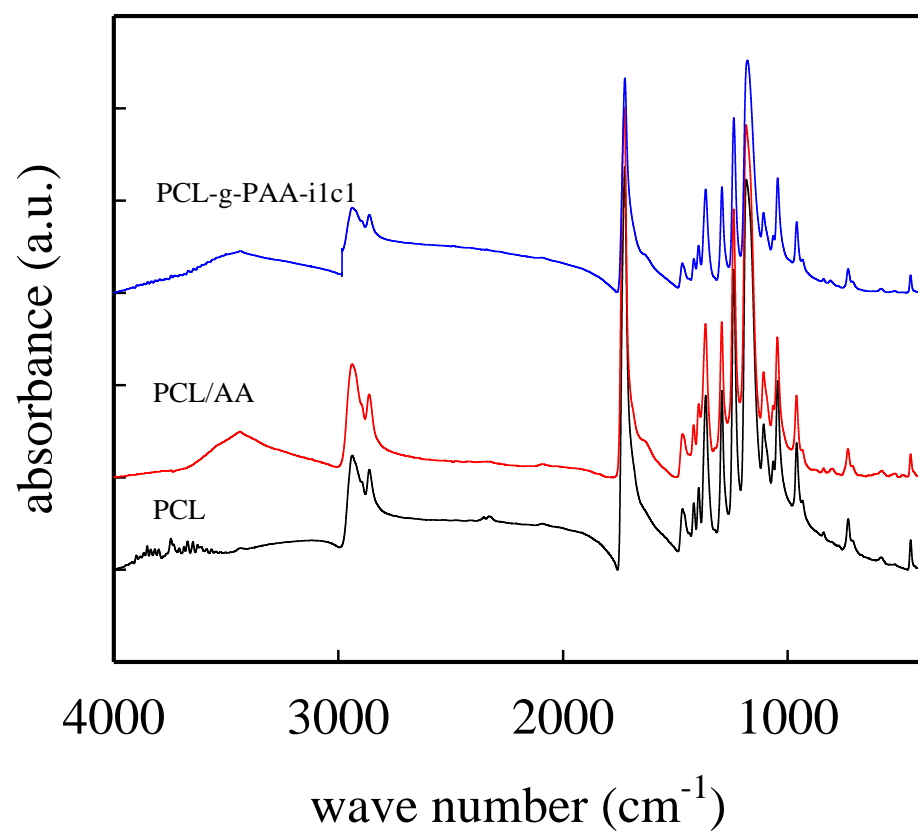

Figure S2. FTIR spectra of the electrospun PCL, PCL/AA 80/20, and PCL-g-PAA-ic1 nanofibers.

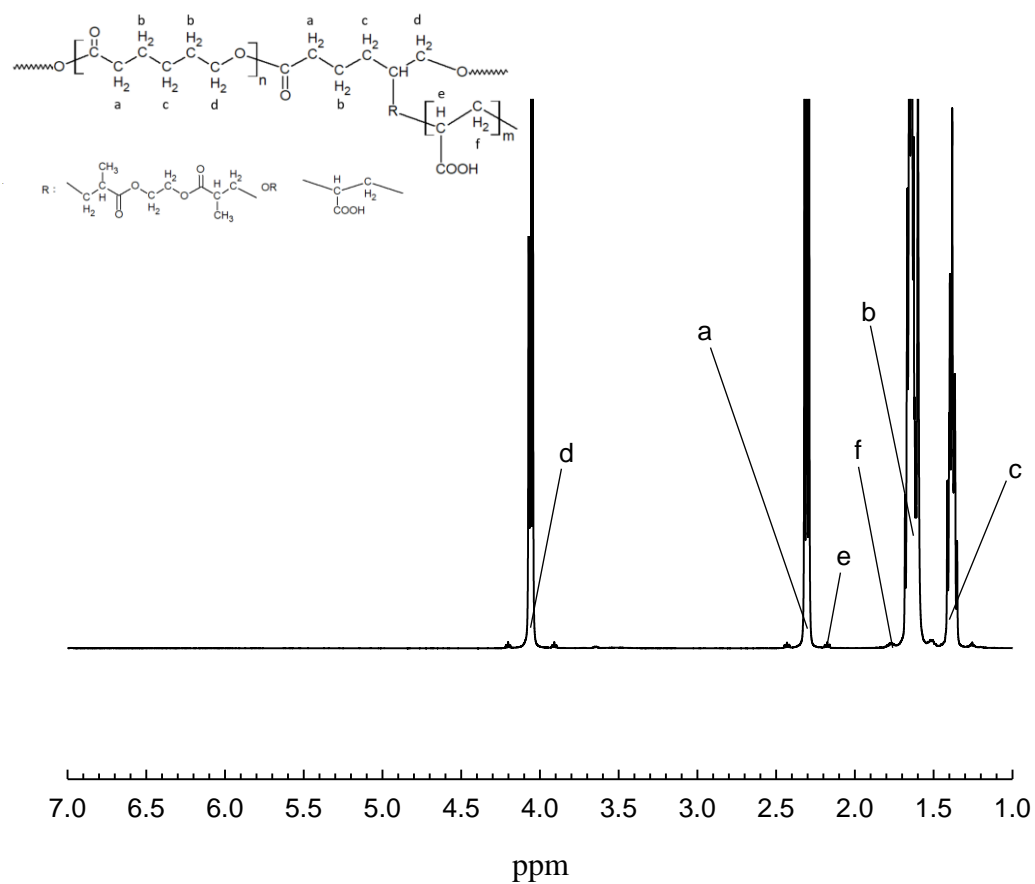

Figure S3.  $^1\text{H}$ -NMR spectra of PCL-g-PAA.

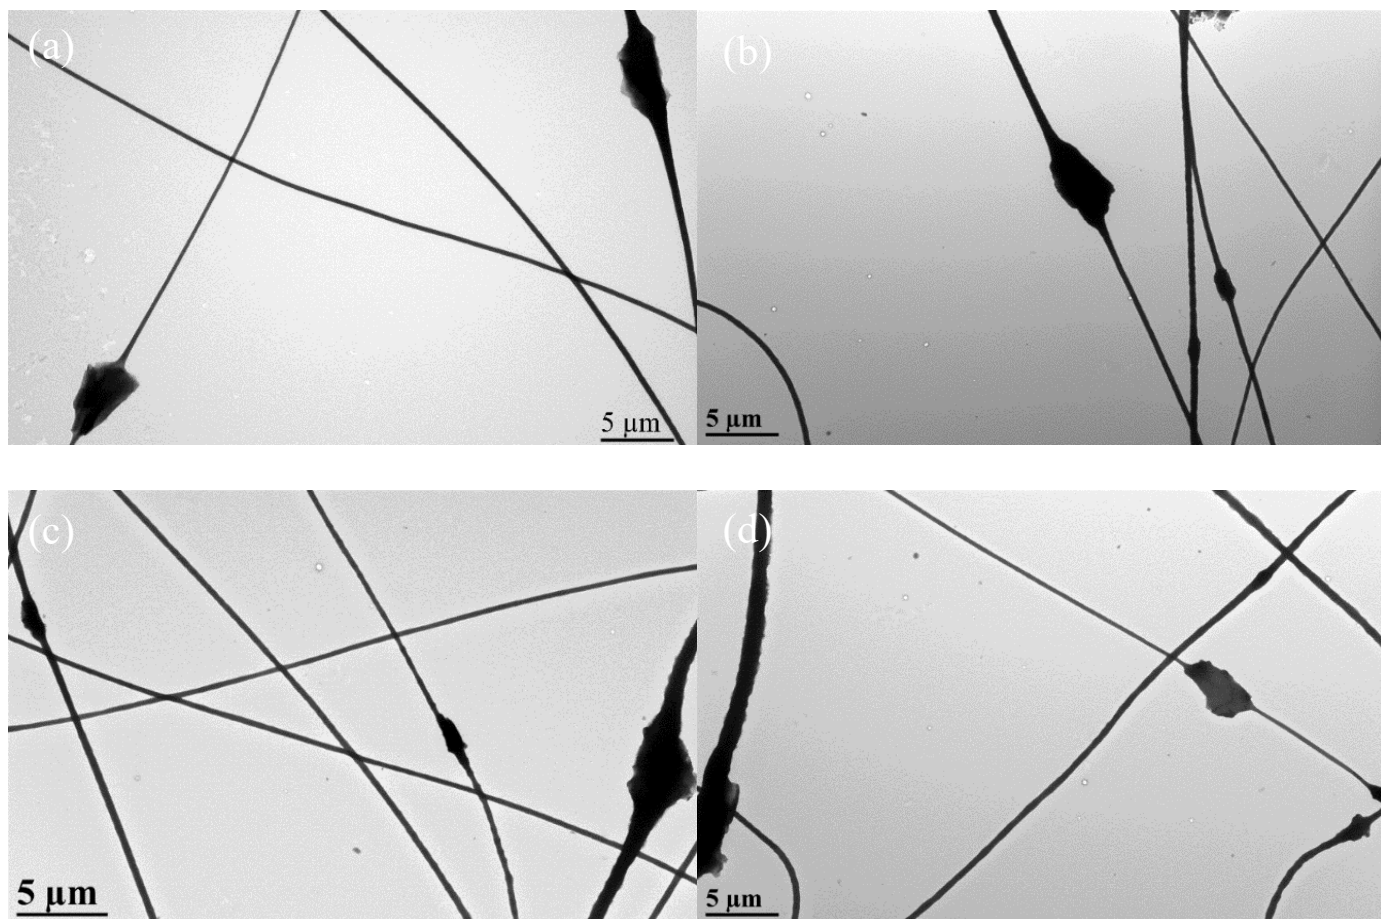

Figure S4. TEM images of electrospun PCL and PCL-g-PAA composite nanofibers filled with various amounts of GO-g-PTA. (a) PCL/GO-g-PTA 95/5, (b) PCL-g-PAA-i1c1/GO-g-PTA 95/5, (c) PCL/GO-g-PTA 90/10, and (d) presented the image of PCL-g-PAA-i1c1/GO-g-PTA 90/10.
